# Supplementary material for: Treatment of oil refinery effluent using bio-adsorbent developed from activated palm kernel shell and zeolite
Source: PubMed Central journal article supplement (PMC9055107; doi:10.1039/d0ra03307c), 2020-06-24
Supplement: RA-010-D0RA03307C-s001.pdf [file RA-010-D0RA03307C-s001.pdf]

### Supplementary Information

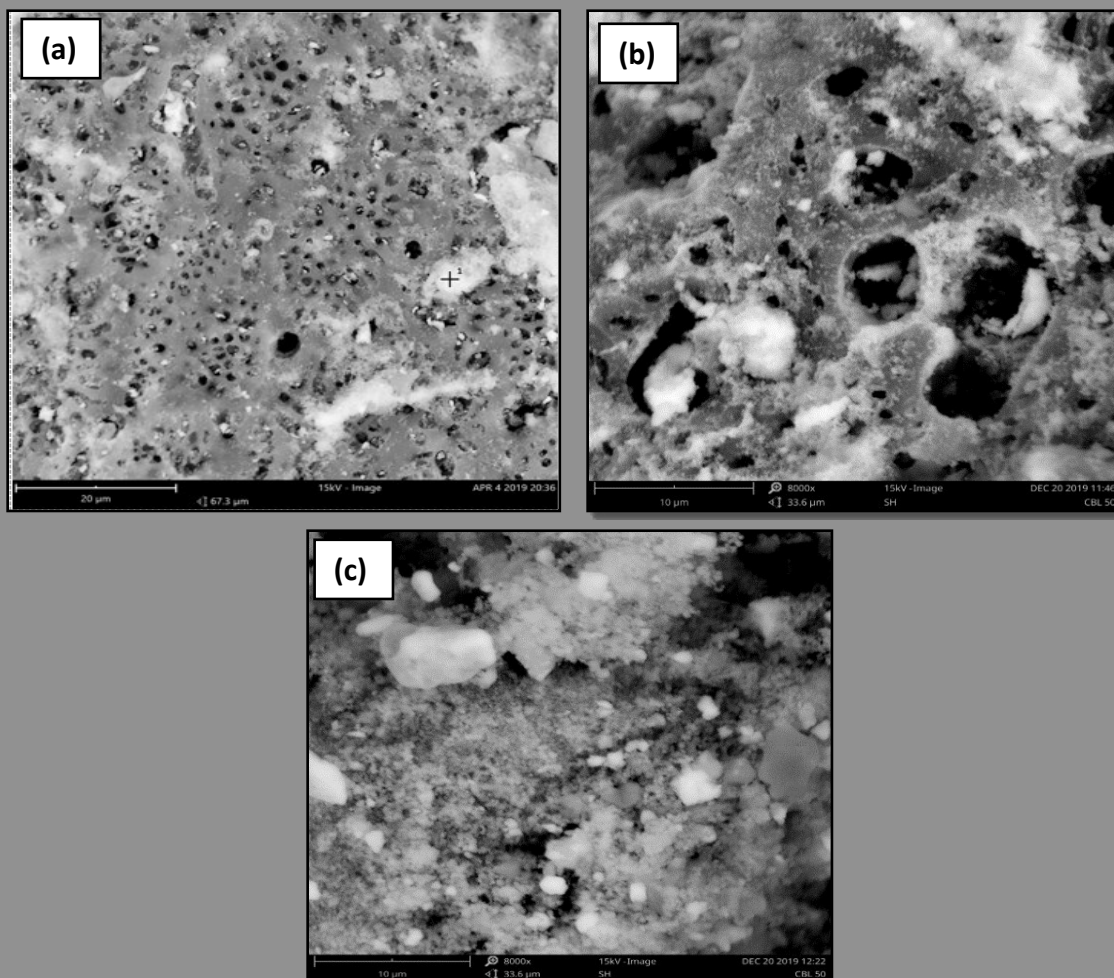

S1: Morphology of (a) AC, (b) Fe/AC and (c) Zeolite-Fe/AC

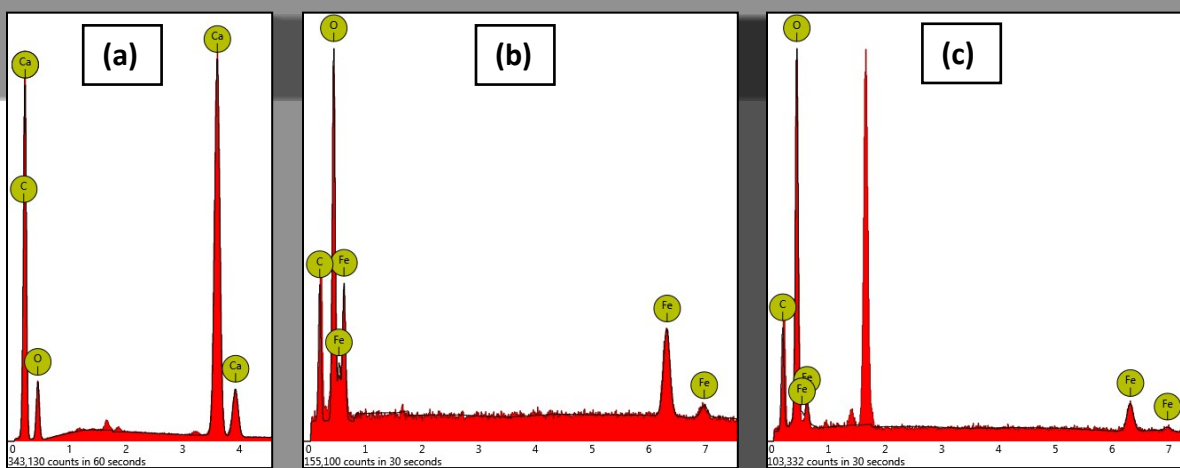

S2: EDX Analysis of (a) AC, (b) Fe/AC and (c) Zeolite-Fe/AC

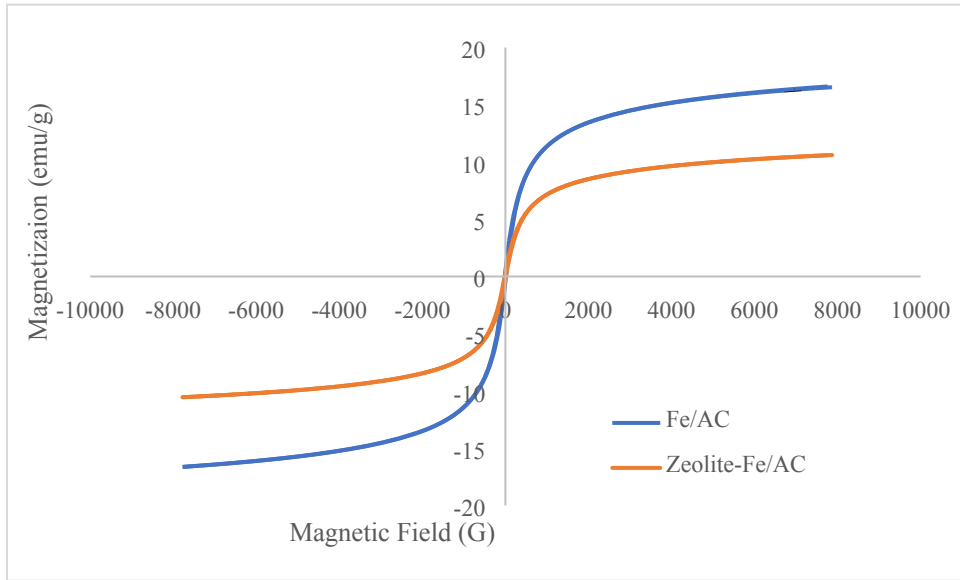

**S3:** Magnetization curves of Fe/AC and Zeolite-Fe/AC adsorbents

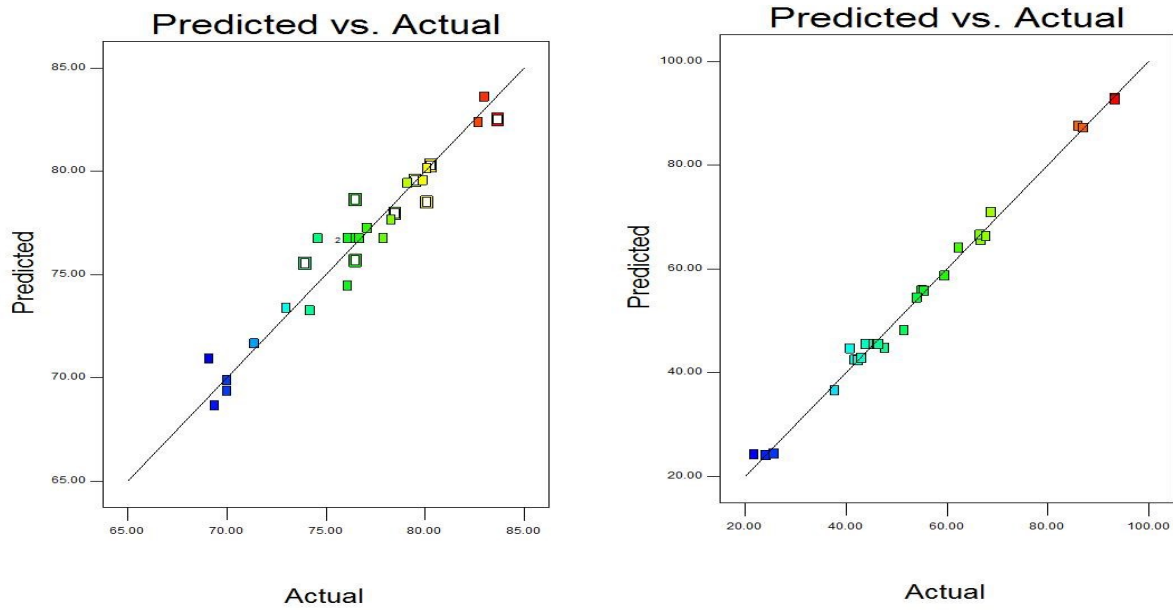

**S4:** Predicted versus Actual plot for Colour removal **(a)** Fe/AC **(b)** Zeolite-Fe/AC

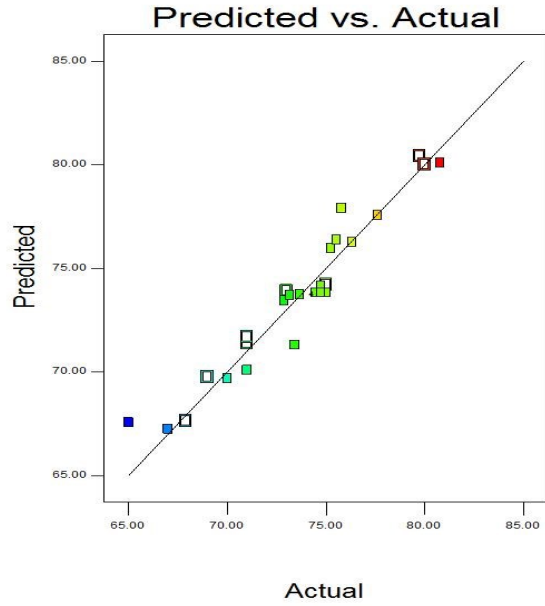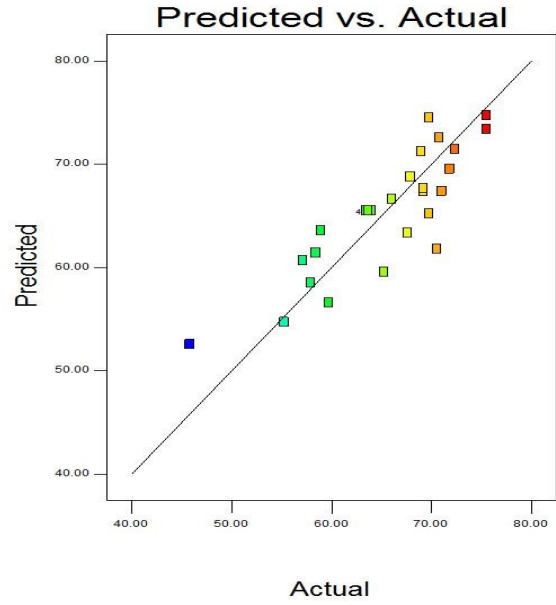

S5: Predicted versus Actual plot for COD removal (a) Fe/AC (b) Zeolite-Fe/AC

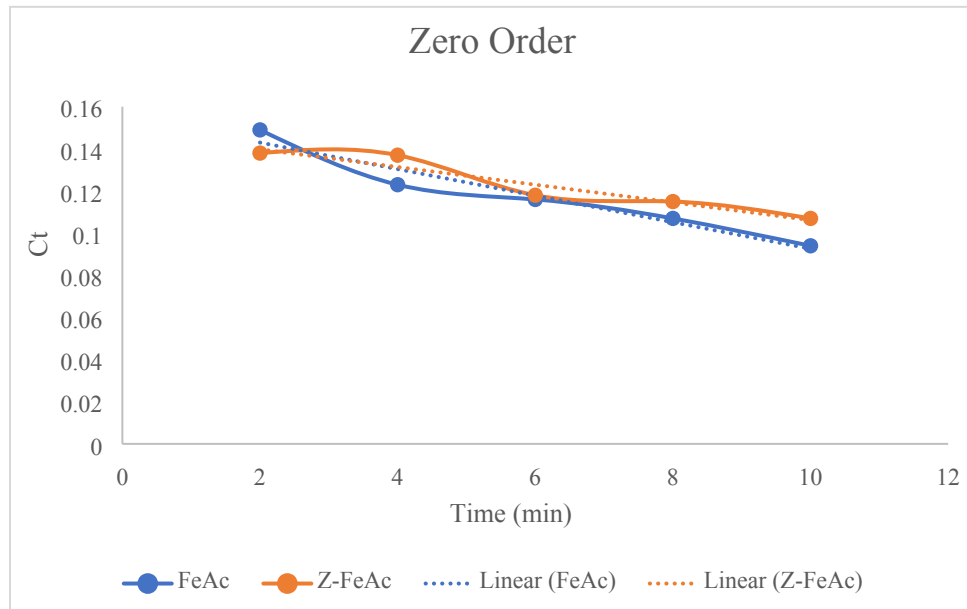

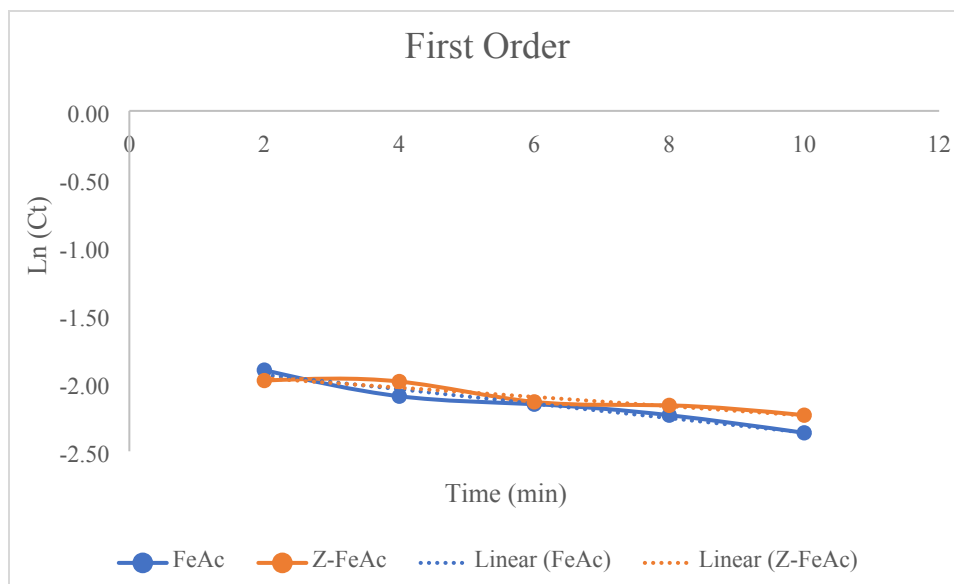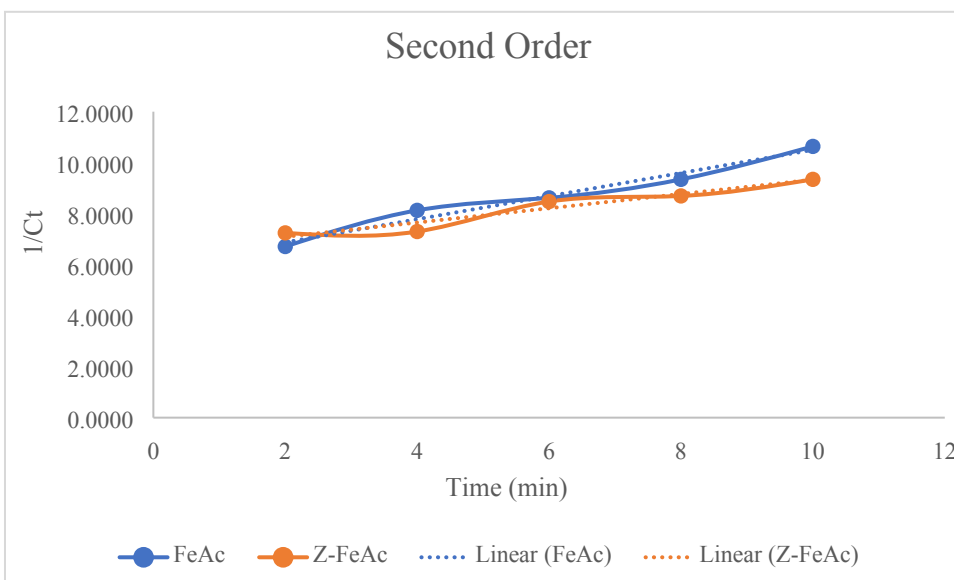

**S6: (a) Zero-order, (b) First order and (c) Second-order reaction kinetic**

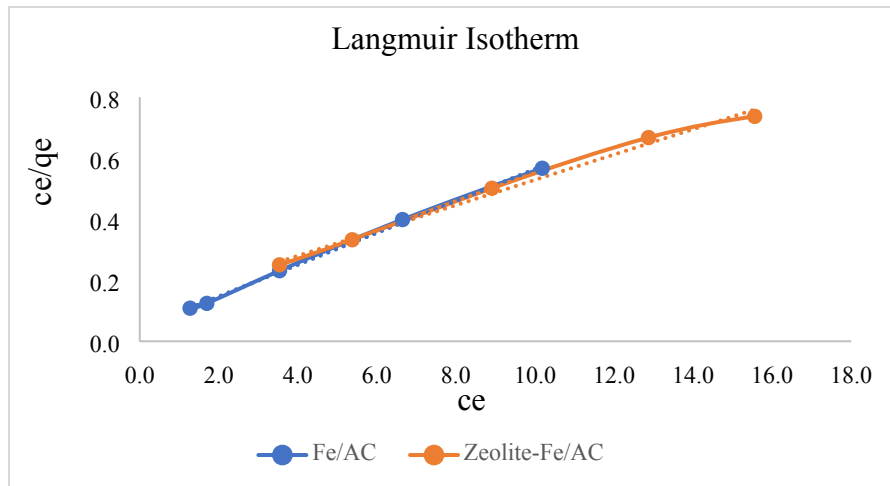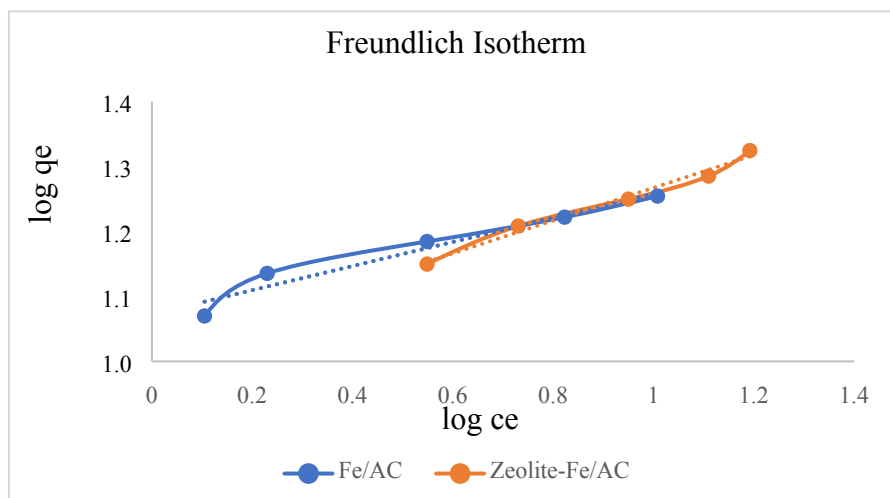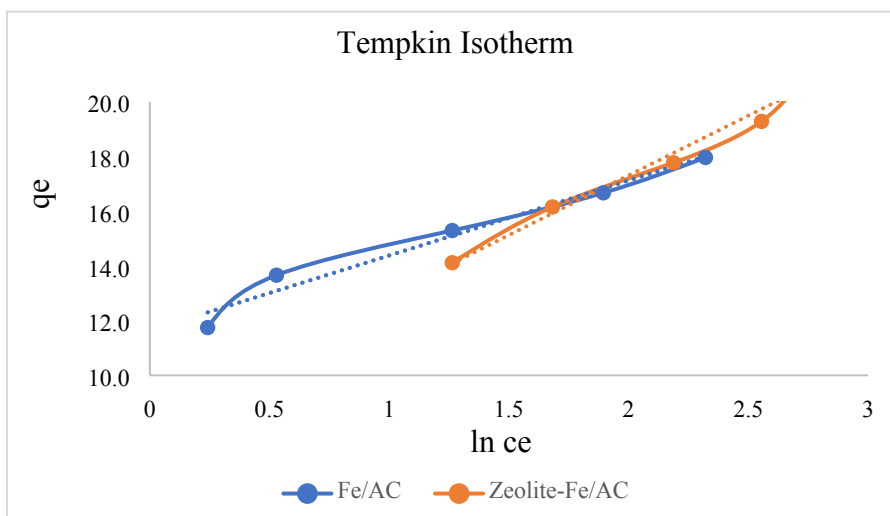

**S7:** Isotherm model of Fe/AC and Zeolite-Fe/AC (a) Langmuir (b) Freundlich (c) Temkin

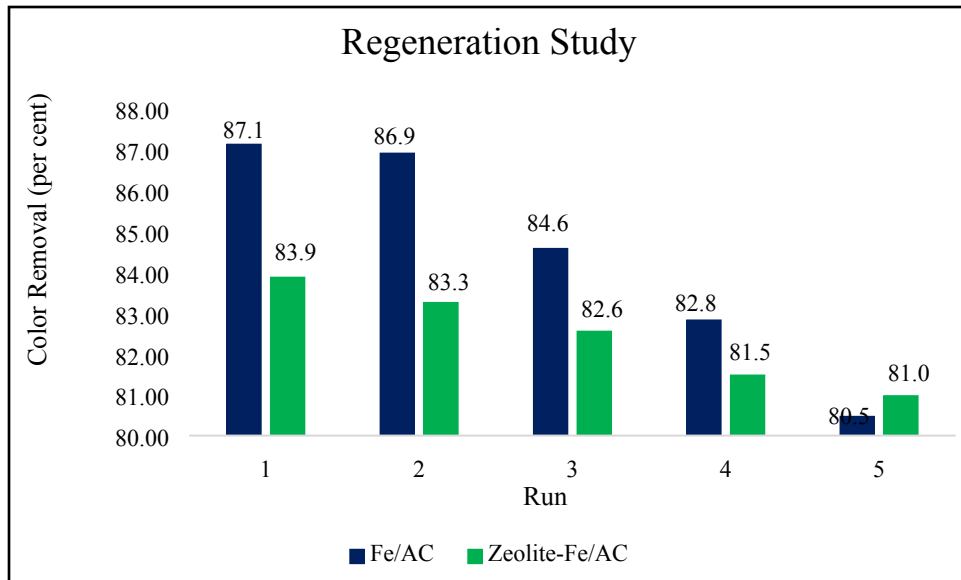

**S8:** Reusability of adsorbents
